# Supplementary material
Source: publisher site journal article supplement (http://www.spandidos-publications.com/1738/downloadSupplementary)
Supplement: Supplementary file 1 [file downloadSupplementary]

Figure S1. EvaGreen ddPCR absolute quantification (copies/ $\mu$ l) of  $\beta$ -actin into two blinded swabs obtained from individuals tested for COVID-19 infection. ddPCR, droplet digital polymerase chain reaction.

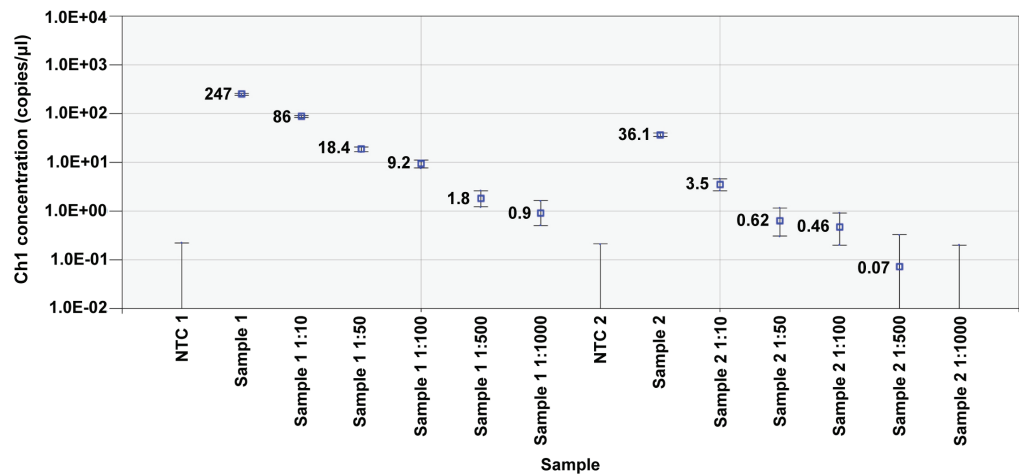

Figure S2. Sequence of the amplified fragment. (A) Peaks obtained through Sanger sequencing; (B) alignment between the amplified fragment and SARS-CoV-2 reference sequence MT077125.

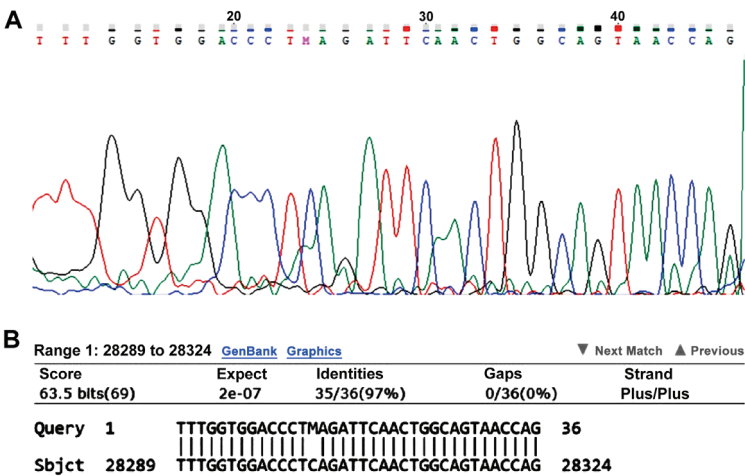

Table SI. Ct values and the RNA concentration (ng *per* reaction) used for  $\beta$ -actin detection.

| ID Sample          | Ct    | Ct average | [RNA]    |
|--------------------|-------|------------|----------|
| Sample 1           | 29.12 | 27.77      | 1.87 ng  |
|                    | 26.56 |            |          |
|                    | 27.65 |            |          |
| Sample 1 1:10      | 25.77 | 25.78      | 0.187 ng |
|                    | 25.79 |            |          |
|                    | 25.78 |            |          |
| Sample 1 1:20      | 28.12 | 28.00      | 0.093 ng |
|                    | 27.89 |            |          |
|                    | 27.98 |            |          |
| Sample 1 1:50      | 30.33 | 30.33      | 0.037 ng |
|                    | 30.32 |            |          |
|                    | 30.33 |            |          |
| Sample 1 1:100     | 35.15 | 33.30      | 0.018 ng |
|                    | 31.54 |            |          |
|                    | 33.22 |            |          |
| Sample 2           | 31.45 | 30.43      | 1.87 ng  |
|                    | 28.92 |            |          |
|                    | 30.92 |            |          |
| Sample 2 1:10      | 29.97 | 29.89      | 0.187 ng |
|                    | 29.83 |            |          |
|                    | 29.86 |            |          |
| Sample 2 1:20      | 32.88 | 33.06      | 0.093 ng |
|                    | 33.26 |            |          |
|                    | 33.04 |            |          |
| Sample 2 1:50      | 35.09 | 35.02      | 0.037 ng |
|                    | 34.95 |            |          |
|                    | 35.03 |            |          |
| Sample 2 1:100     | 35.93 | 36.56      | 0.018 ng |
|                    | 37.34 |            |          |
|                    | 36.41 |            |          |
| NTC $\beta$ -actin | -     | -          |          |
|                    | -     |            |          |
|                    | -     |            |          |

[RNA], concentration of RNA *per* reaction.
